# Supplementary material
Source: Frontiers journal article supplement (https://www.frontiersin.org/articles/300162)
Supplement: Data_Sheet_1.pdf [file Data_Sheet_1.pdf]

## **Supplementary Figures and Tables**

# **Human Cardiac-Derived Stem/Progenitor Cells Fine-Tune Monocyte-Derived Descendants Activities Toward Cardiac Repair**

Noémie Dam<sup>1,3</sup>, Hocine Rachid Hocine<sup>3</sup>, Itziar Palacios<sup>1</sup>, Olga delaRosa<sup>2</sup>, Ramón Menta<sup>1</sup>,  
Dominique Charron<sup>3,4</sup>, Armand Bensussan<sup>3</sup>, Hicham El Costa<sup>5</sup>, Nabila Jabrane-Ferrat<sup>5</sup>,  
Wilfried Dalemans<sup>6</sup>, Eleuterio Lombardo<sup>2\*</sup>, Reem Al-Daccak<sup>3,4\*</sup>

**Supplementary Figure 1:  $CD14^+CD16^-$  monocytes migrate in response to CCL-2 and hCPC-conditioned medium**

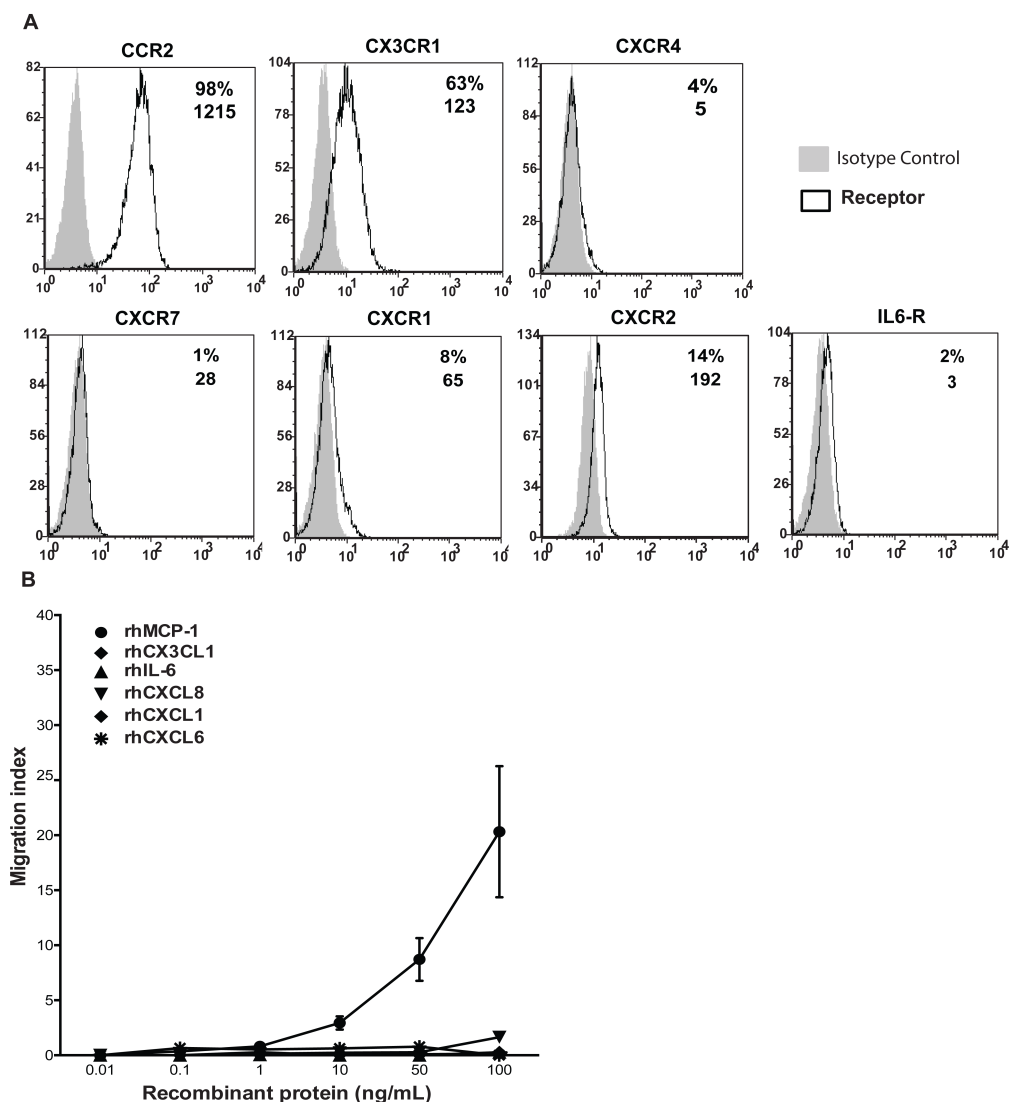

A)  $CD14^+CD16^-$  monocytes were isolated from blood samples and their expression of various chemokine receptors was determined using specific antibodies and flow cytometry analysis. B)  $CD14^+CD16^-$  monocytes migration in response to various recombinant chemokines was determined by flow cytometry in Boyden chambers with 5 $\mu$ m pores. Freshly isolated  $CD14^+CD16^-$  monocytes were plated in the upper compartment whereas stimuli were loaded in the lower compartment of the transwell chambers. The number of migrated monocytes (into the lower compartment) was counted by flow cytometry and used to calculate the migration index as follow: number of cells migrated in presence of a stimulus/number of cells migrated in absence of stimulus.

**Supplementary Figure 2: *hCPC* tend adherence-activated  $CD14^+CD16^-$  monocytes towards anti-inflammatory profile**

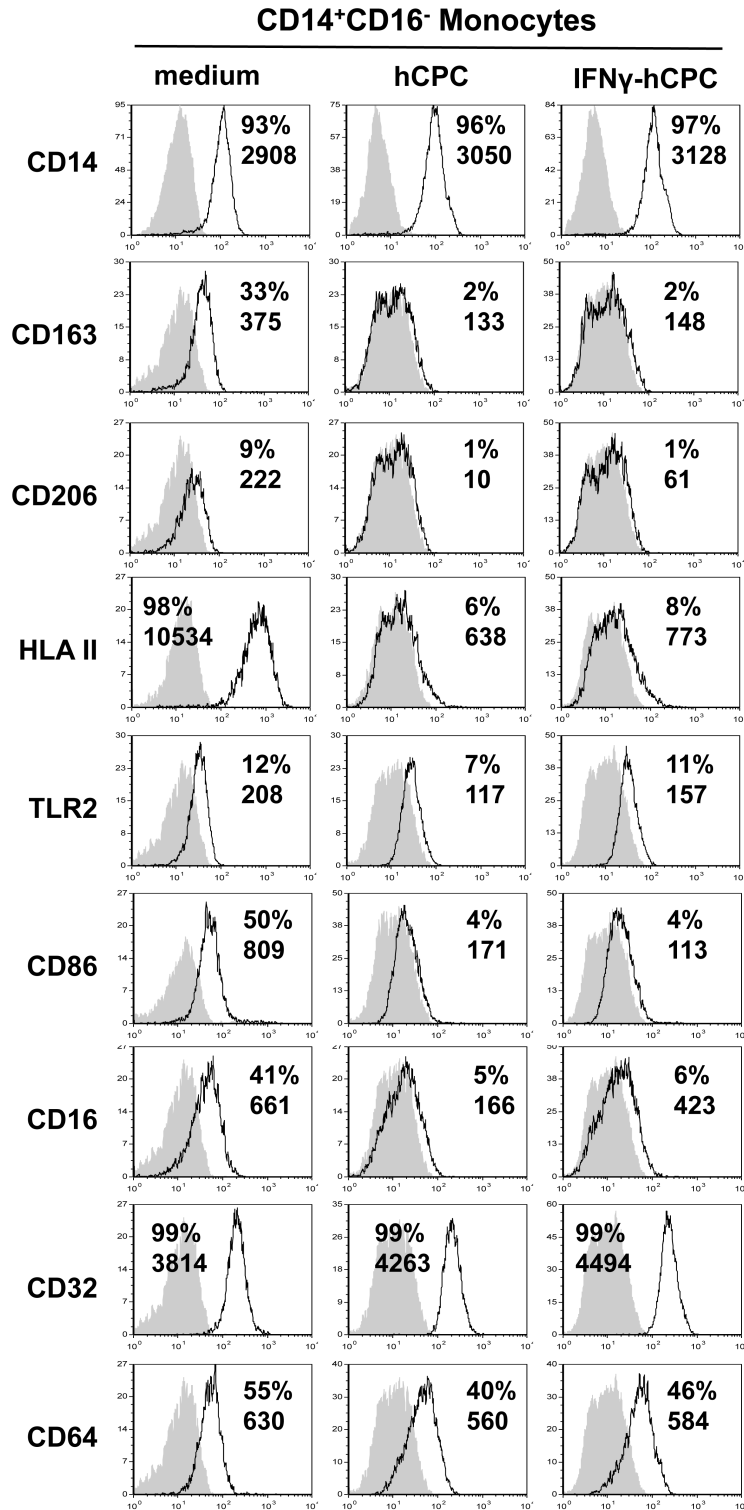

$CD14^+CD16^-$  monocytes were cultured for 5 days in the absence (medium) or the presence of hCPC (hCPC) or IFN $\gamma$ -hCPC (IFN $\gamma$ -hCPC) at a ratio of 5:1 then the expression of informative markers was determined using specific antibodies and flow cytometry analysis. Representative histograms indicating the percentage of positive cells and geometric mean.

**Supplementary Figure 3: *Allogeneic hCPC fine-tune CD14<sup>+</sup>CD16<sup>-</sup> monocytes polarization/activation***

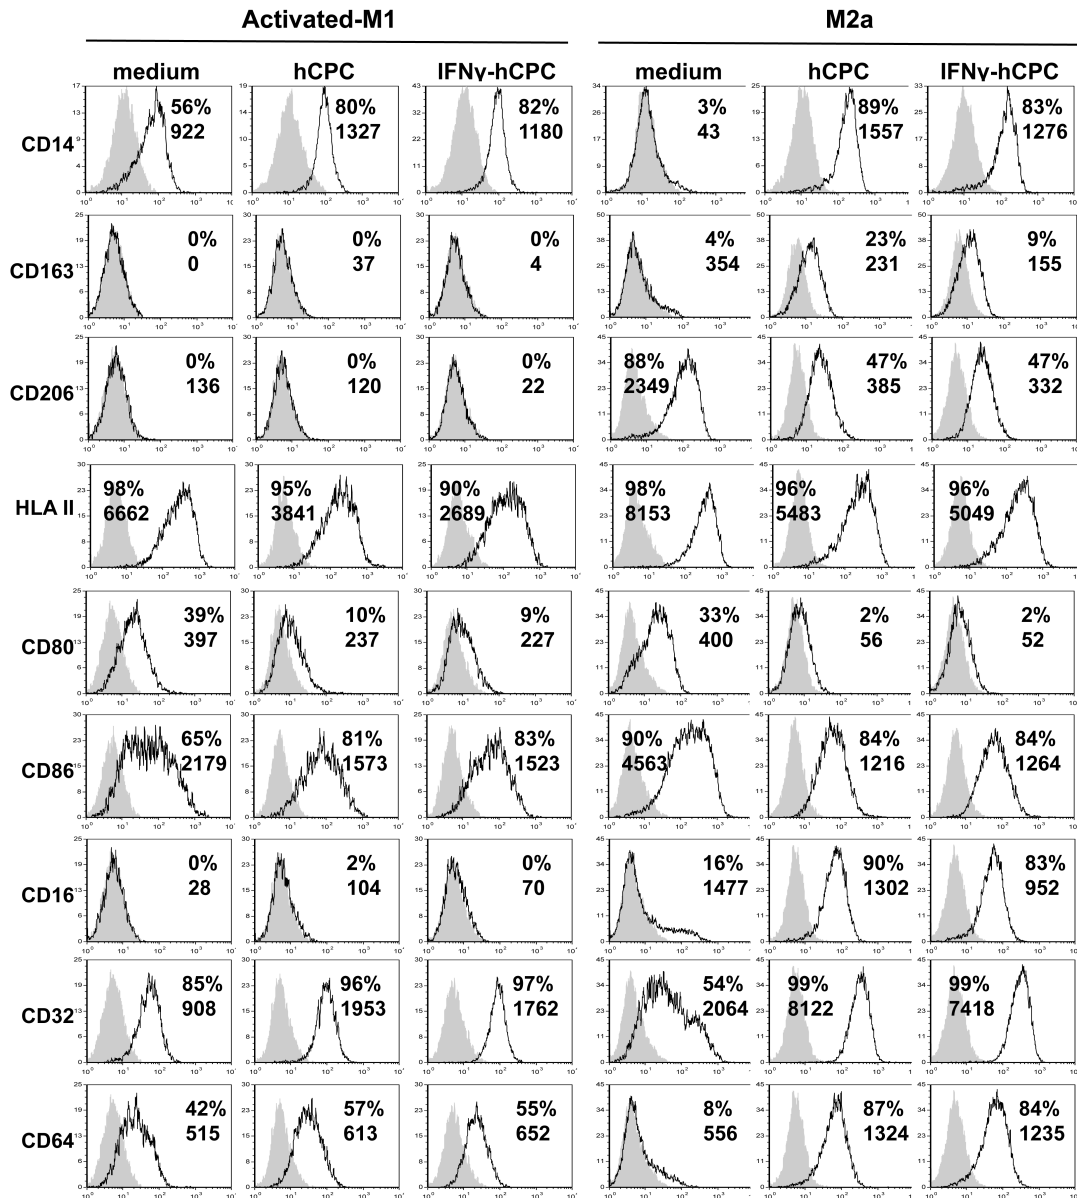

CD14<sup>+</sup>CD16<sup>-</sup> monocytes were polarized/activated with a cocktail of M-CSF/IFN $\gamma$ /LPS towards activated-M1 phenotype in the absence (medium) or the presence of hCPC (hCPC) or IFN $\gamma$ -hCPC (IFN $\gamma$ -hCPC) or with a cocktail of M-CSF/IL-4/IL-13 towards M2a phenotype in the absence (medium) or the presence of hCPC (hCPC) or IFN $\gamma$ -hCPC (IFN $\gamma$ -hCPC) for 5 days. The expression of informative markers was then determined using specific antibodies and flow cytometry analysis. Representative histograms indicating the percentage of positive cells and the geometric mean.



**Supplementary Figure 4:  $CD14^+CD16^-$  monocytes-derived DC acquire macrophage-like profile in the presence of allogeneic hCPC**

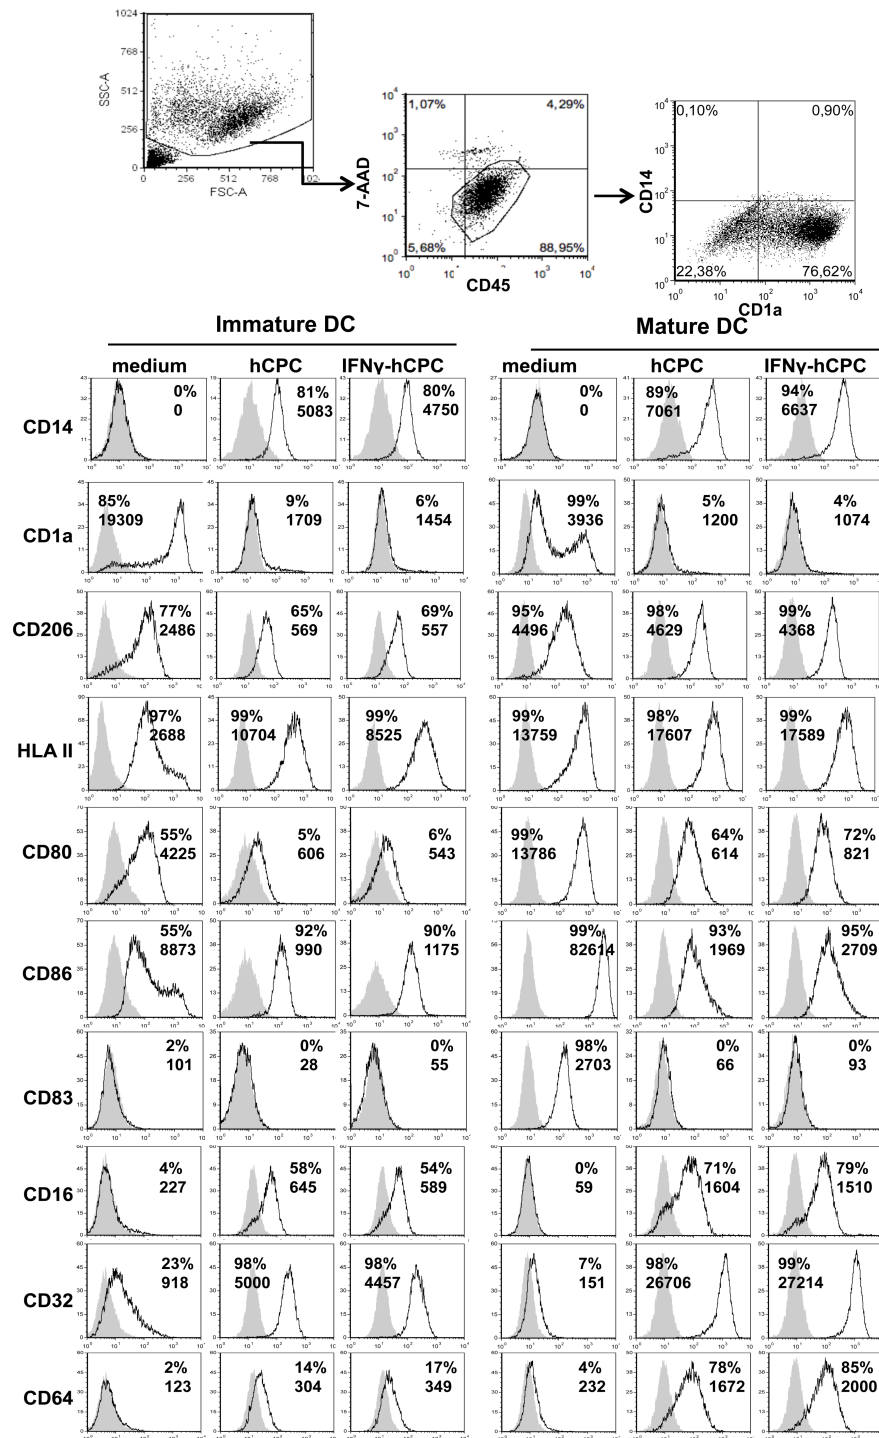

$CD14^+CD16^-$  monocytes were differentiated into DC with a GM-CSF/IL-4 cocktail (immature DC) in the absence (medium) or presence of hCPC (hCPC) or IFN $\gamma$ -hCPC (IFN $\gamma$ -hCPC) for 5 days at a ratio of 5:1. LPS was then added for another 2 days to induce the maturation of DC (mature DC) in the absence (medium) or the presence of hCPC (hCPC), or IFN $\gamma$ -hCPC (IFN $\gamma$ -hCPC). The expression of informative markers was then determined using specific antibodies and flow cytometry analysis. Representative histograms indicating the percentage of positive cells and the geometric mean.

**Supplementary Figure 5:  $iDC$ ,  $iDC^{hCPC}$ , and  $iDC^{IFN\gamma-hCPC}$  are unable to stimulate allogeneic T cells proliferation**

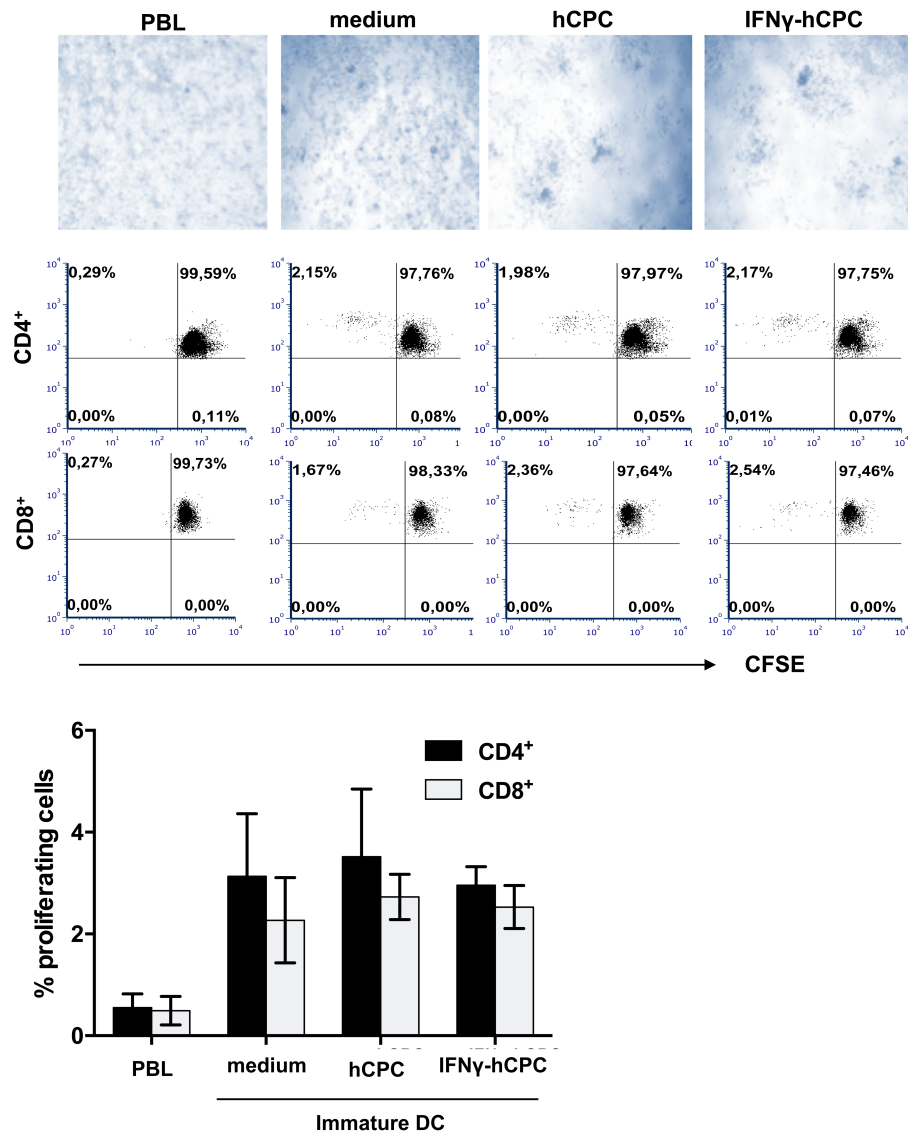

$iDC$  generated in the absence (medium) or presence of hCPC (hCPC) or IFN $\gamma$ -hCPC (IFN $\gamma$ -hCPC) were used to stimulate the proliferation of allogeneic CFSE-labeled PBL at a PBL/DC ratio of 5:1 (upper panel). The percentage of CD4<sup>+</sup> and CD8<sup>+</sup> proliferating T-cells was determined by flow cytometry. Representative dot plots from one experiment indicating the percentage of proliferating cells (middle panel), and histograms present mean % proliferating cells  $\pm$  SEM of triplicates obtained from two independent experiments (lower panel).

**Table 1: Antibodies used through out the study**

| NAME        | FLUOROCROME  | HOST  | CLONE  | CATALOG NUMBER | COMPANY          |
|-------------|--------------|-------|--------|----------------|------------------|
| CD45        | FITC         | MOUSE | HI30   | 555482         | BD               |
| CD14        | APC          | MOUSE | M5E1   | 555399         | BD               |
| CD1a        | PE           | MOUSE | HI149  | 555807         | BD               |
| CD16        | PE           | MOUSE | 3G8    | 555407         | BD               |
| CD32        | PE           | MOUSE | 3D3    | 552884         | BD               |
| CD40        | PE           | MOUSE | 5C3    | 555589         | BD               |
| CD80        | PE           | MOUSE | L307.4 | 557227         | BD               |
| CD86        | PE           | MOUSE | IT2.2  | 555665         | BD               |
| CD83        | PE           | MOUSE | BH15e  | 556855         | BD               |
| CD163       | PE           | MOUSE | GHI/61 | 556018         | BD               |
| CD206       | PE           | MOUSE | 19.2   | 555954         | BD               |
| TLR2(CD282) | PE           | MOUSE | 11G7   | 565349         | BD               |
| HLA-II      | PE           | MOUSE | WR18   | MA1-80680      | ebiosciences     |
| CD64        | PE           | MOUSE | 10.1   | CD6404         | Miltenyi Biotech |
| CD3         | APC          | MOUSE | SK7    | 345767         | BD               |
| CD4         | PACIFIC BLUE | MOUSE | RPA-T4 | 558116         | BD               |
| CD8         | APC          | MOUSE | SK1    | 560179         | BD               |
| CD25        | PE           | MOUSE | 4E3    | 130-091-024    | Miltenyi Biotech |
